# Supplementary material for: Effects of Rapamycin on Insulin Brain Endothelial Cell Binding and Blood–Brain Barrier Transport
Source: Med Sci (Basel). 2021 Aug 25;9(3):56. doi: 10.3390/medsci9030056 (PMC8395935; doi:10.3390/medsci9030056)
Supplement: Supplementary file 1 [file medsci-09-00056-s001.zip › medsci-1193836-supplementary.pdf]

Article

# Supplementary Materials:

## Effects of Rapamycin on Insulin Brain Endothelial Cell Binding and Blood–Brain Barrier Transport

Steven Nguyen <sup>1</sup>, William A. Banks <sup>2,3</sup> and Elizabeth M. Rhea <sup>2,3,\*</sup>

<sup>1</sup> University of Washington, Seattle, WA 98195, USA.

<sup>2</sup> Department of Medicine, Division of Gerontology and Geriatric Medicine, University of Washington, Seattle, WA 98195, USA.

<sup>3</sup> Research and Development, Veterans Affairs Puget Sound Health Care System, Seattle, WA 98108, USA.

\* Correspondence: meredime@uw.edu

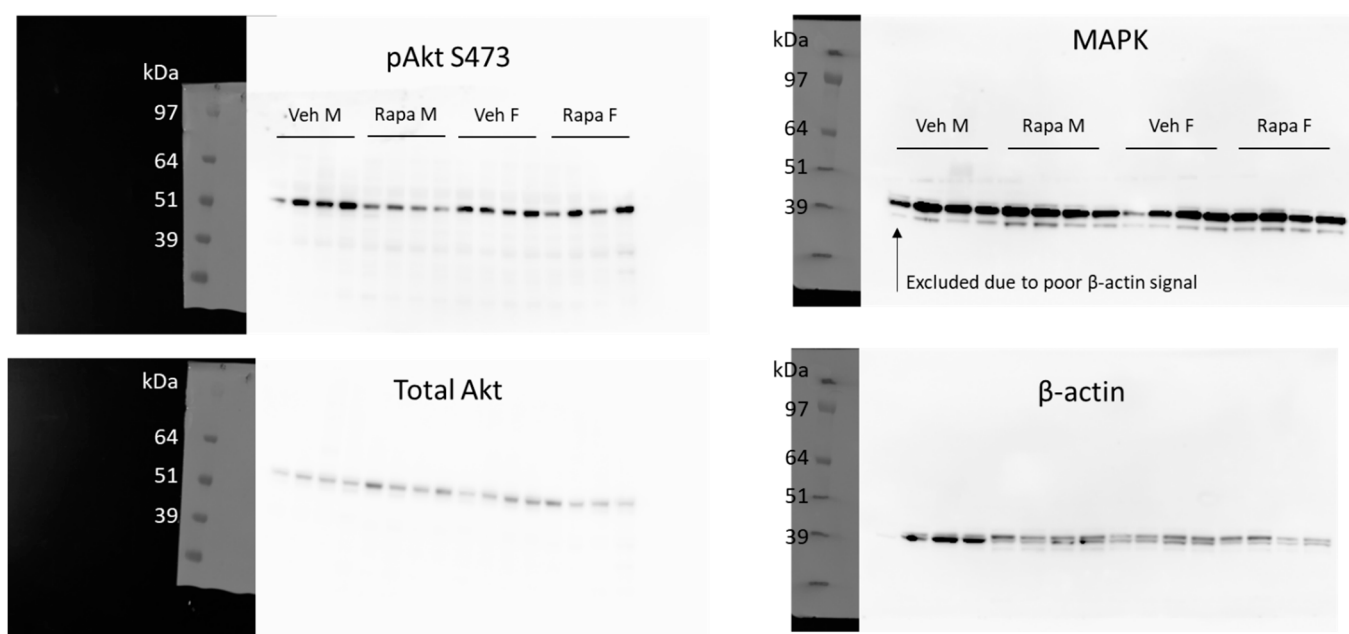

**Figure S1.** Western blots for Aorta (Figure 5).
